# Supplementary material
Source: PubMed Central journal article supplement (PMC4837698)
Supplement: NIHMS774171-supplement-Supplement.pdf [file NIHMS774171-supplement-Supplement.pdf]

# A Photosensitizer-Loaded DNA Origami Nanosystem for Photodynamic Therapy

Xiaoxi Zhuang,<sup>†,‡</sup> Xiaowei Ma,<sup>\*,†,‡</sup> Xiangdong Xue,<sup>†</sup> Qiao Jiang,<sup>‡</sup> Linlin Song,<sup>‡</sup> Luru Dai,<sup>‡</sup> Chunqiu Zhang,<sup>†</sup> Shubin Jin,<sup>†</sup> Keni Yang,<sup>†</sup> Baoquan Ding,<sup>‡</sup> Paul C. Wang,<sup>§,||</sup> and Xing-Jie Liang<sup>\*,†</sup>

<sup>†</sup>Laboratory of Controllable Nanopharmaceuticals, CAS Key Laboratory for Biomedical Effects of Nanomaterials and Nanosafety, National Center for Nanoscience and Technology, Beijing 100190, China

<sup>‡</sup>CAS Key Laboratory of Nanosystem and Hierarchical Fabrication, National Center for Nanoscience and Technology, Beijing 100190, China

<sup>§</sup>Fu Jen Catholic University, Taipei 24205, Taiwan

<sup>||</sup>Laboratory of Molecular Imaging, Department of Radiology, Howard University, Washington, DC 20060, United State

\*maxw@nanoctr.cn

\*liangxj@nanoctr.cn.

⊥ These authors contributed equally to this work.

## SUPPORTING FIGURES

**A**

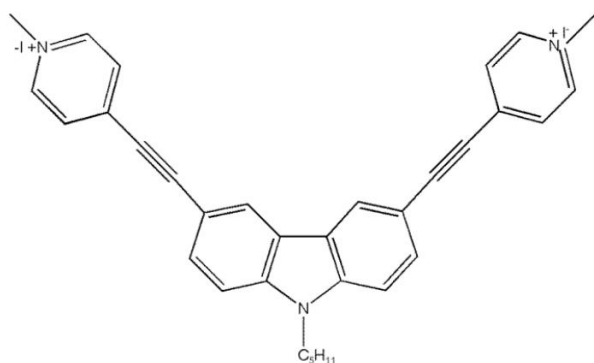

**B**

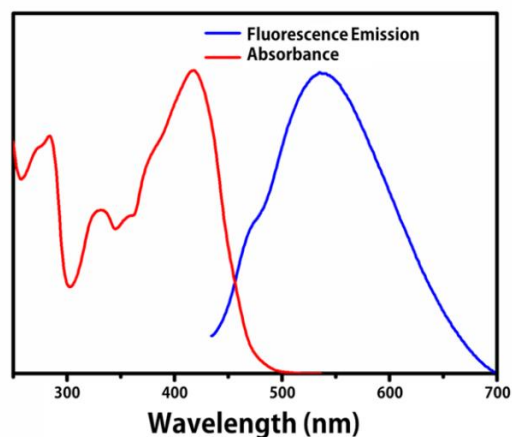

**Figure S1.** Spectroscopic properties of BMEPC photosensitizer. (A) Chemical structure of BMEPC molecules. (B) Normalized UV-vis absorption and one-photon induced fluorescence emission spectra of BMEPC in ddH<sub>2</sub>O.

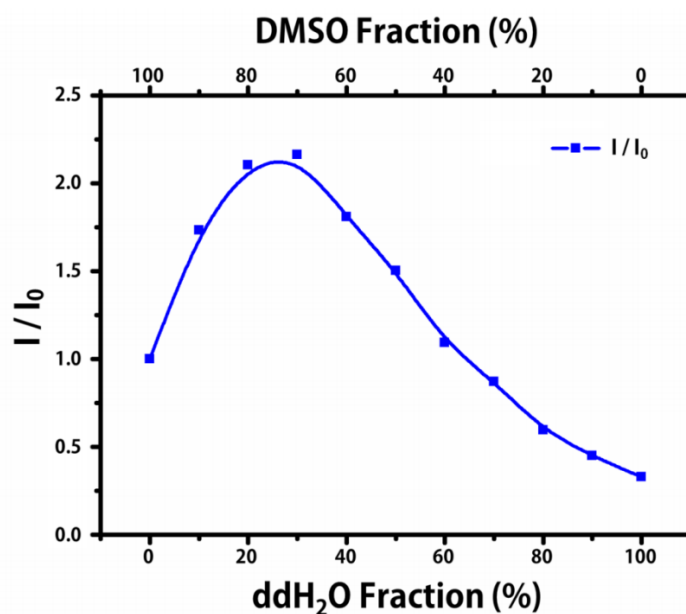

**Figure S2.** Plot of fluorescence intensity (I) of 20  $\mu$ M BMEPC in different fractions of DMSO/ddH<sub>2</sub>O mixture versus that in pure DMSO (I<sub>0</sub>).

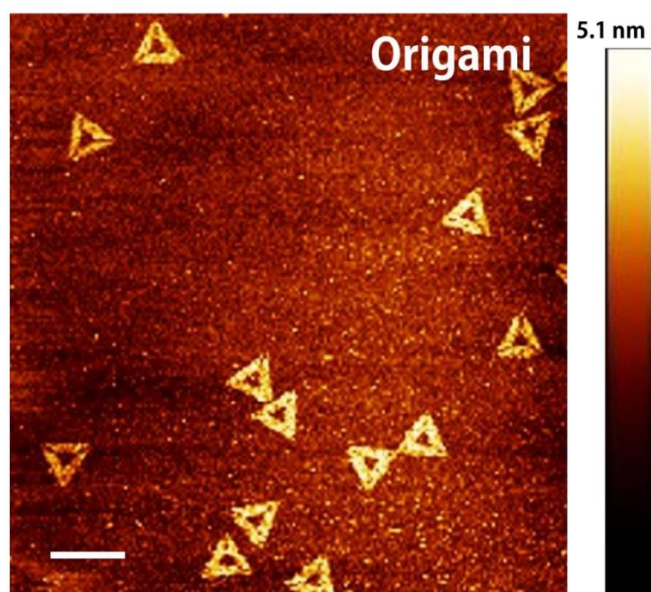

**Figure S3.** AFM image of triangular-shaped DNA origami. The scale bar is 200 nm.

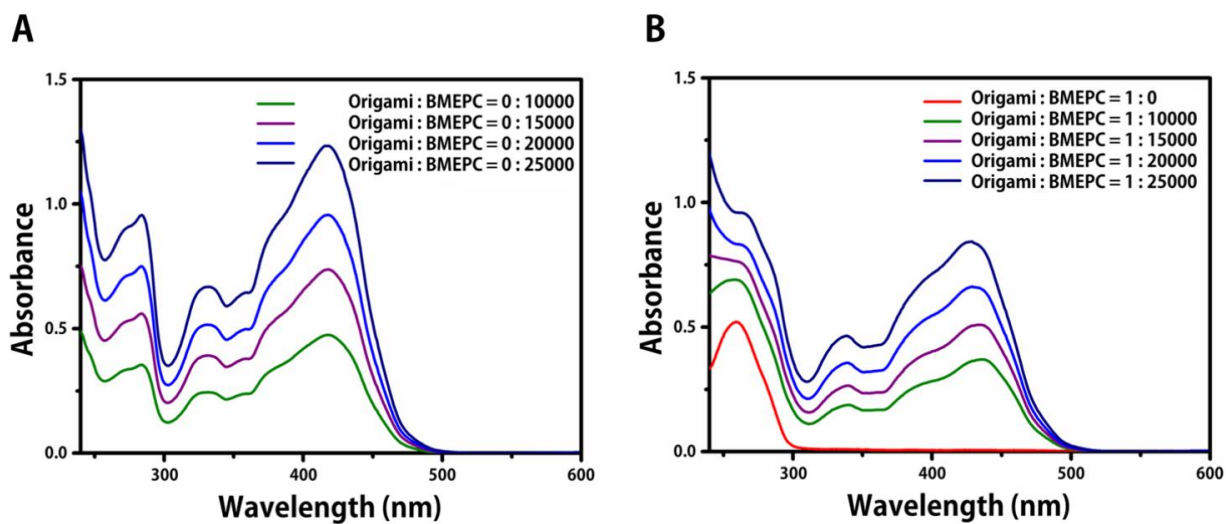

**Figure S4.** UV-vis absorption spectra. (A) Absorption spectra of BMEPC in ddH<sub>2</sub>O. (B) Absorption spectra of BMEPC-loaded DNA origami complex of different BMEPC molar ratios in ddH<sub>2</sub>O.

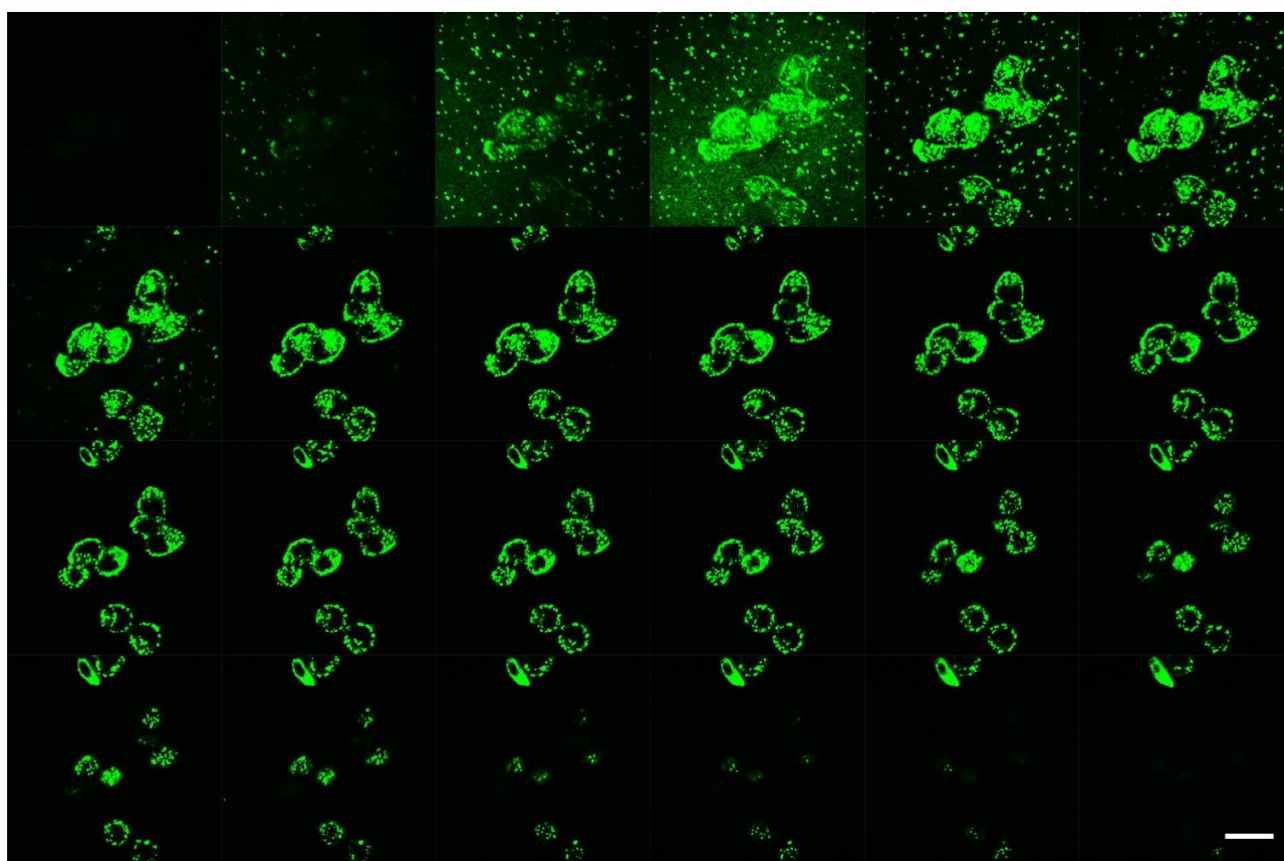

**Figure S5.** One-photon induced vertical section scanning at 405 nm excitation. Adhered MCF-7 cells were incubated with 1.0 nM (20 μM BMEPC-loaded) DNA origami for 12 h in DMEM and imaging in DMEM (phenol red free). The scale bar is 25 μm.

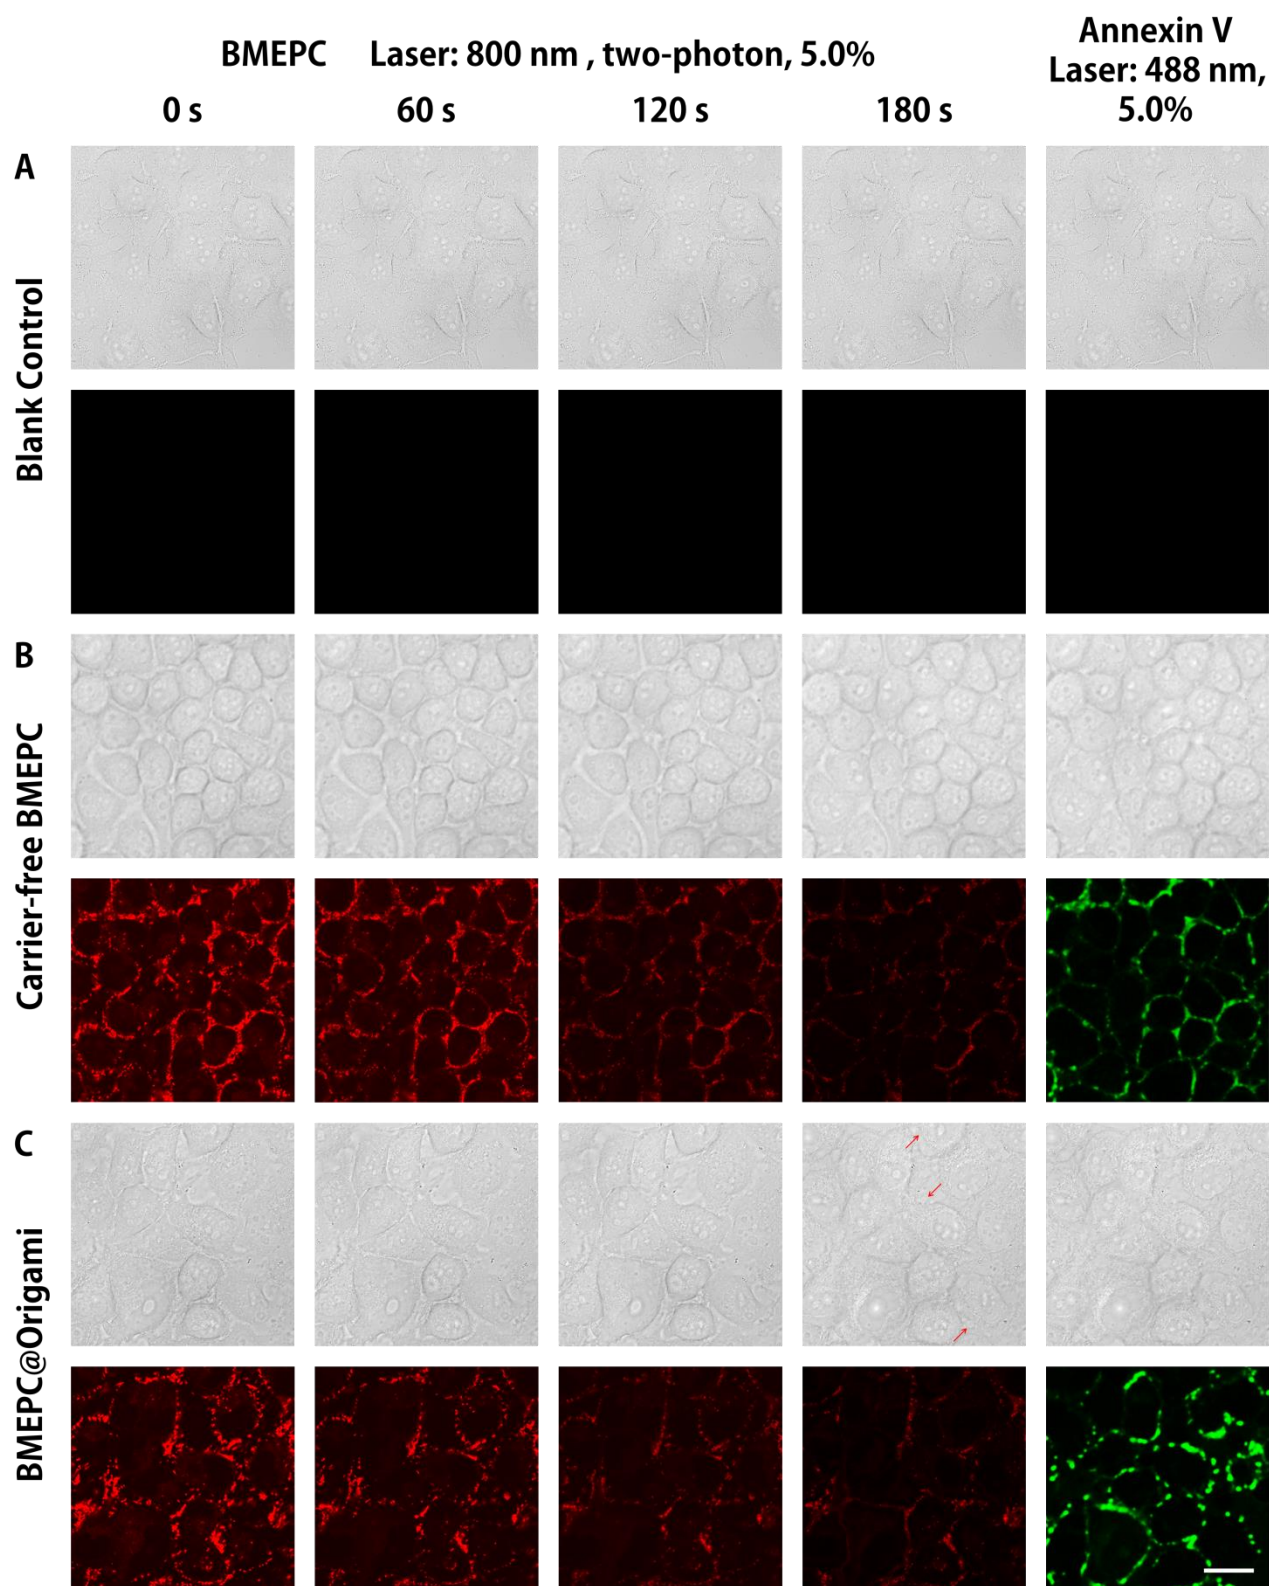

**Figure S6.** Two-photon induced CLSM imaging and irradiating at 800 nm excitation. Adhered MCF-7 cells (A) were incubated with 20  $\mu$ M carrier-free BMEPC (B) and 1 nM (20  $\mu$ M BMEPC-loaded) DNA origami complex (C) individually for 12 h in DMEM and then irradiated for 180 s in DMEM (phenol red free). The scale bar is 25  $\mu$ m.

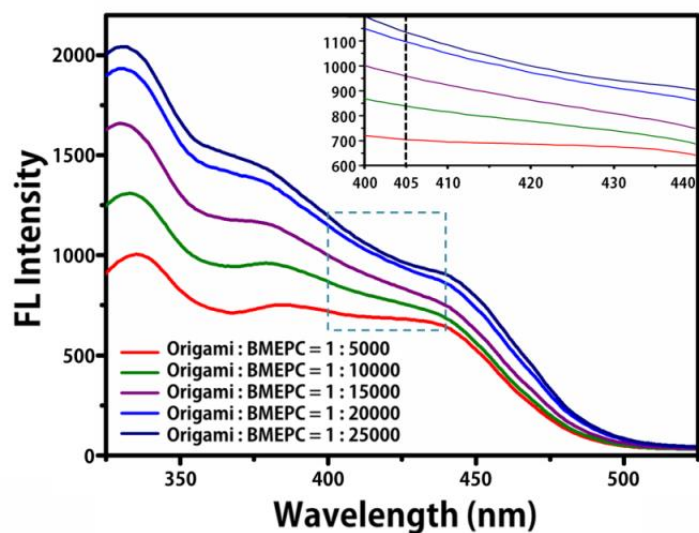

**Figure S7.** Excitation spectra of BMEPC-loaded DNA origami in ddH<sub>2</sub>O.

**Table S1.** The imaging parameters of all confocal laser scanning microscopes.

| confocal laser scanning microscope | Excitation Wavelength | Emission Wavelength Range | Exposure Time       |
|------------------------------------|-----------------------|---------------------------|---------------------|
| Carl Zeiss (Figure 3)              | 405 nm                | 510-585 nm                | Shown in the images |
|                                    | 488 nm                | 520-530 nm                |                     |
| Perkin-Elmer (Figure 4)            | 440 nm                | 510-585 nm                | Shown in the images |
|                                    | 488 nm                | 520-530 nm                |                     |
| Leica (Figure S6)                  | 800 nm two-photon     | 575-630 nm                | Shown in the images |
|                                    | 488 nm one-photon     | 520-530 nm                |                     |
